# Supplementary material for: Halide-guided carbon-affinity active sites in BimOnBrp-derived Bi2O2CO3 for efficient electrocatalytic CO2 reduction to formate
Source: Royal Society of Chemistry journal article supplement (doi:10.1039/d4cy00904e), 2024-01-01
Supplement: d4cy00904e1.pdf [file d4cy00904e1.pdf]

## Supporting Information

# Halide-Guided Carbon-Affinity Active Site in $\text{Bi}_m\text{O}_n\text{Br}_p$ - Derived $\text{Bi}_2\text{O}_2\text{CO}_3$ for Efficient Electrocatalytic $\text{CO}_2$ Reduction to Formate

Dengye Yang<sup>a</sup>, Qing Mao<sup>\*,a</sup>, Yuting Feng<sup>a</sup>, Wei Zhou<sup>a</sup>

<sup>a</sup> School of Chemical Engineering, Dalian University of Technology, Dalian 116024,

China

\*Corresponding Author

E-mail: [maoqing@dlut.edu.cn](mailto:maoqing@dlut.edu.cn)

# Table of Contents

|                                                                           |           |
|---------------------------------------------------------------------------|-----------|
| <b>1 Product analysis .....</b>                                           | <b>3</b>  |
| 1.1 Gas product analysis .....                                            | 3         |
| 1.2 Liquid product analysis.....                                          | 3         |
| <b>2 Kinetics calculation section of CO<sub>2</sub>RR to formate.....</b> | <b>5</b>  |
| <b>3 Supporting Figures and Tables.....</b>                               | <b>6</b>  |
| <b>Reference .....</b>                                                    | <b>21</b> |

# 1 Product analysis

## 1.1 Gas product analysis

Gas chromatography (GC, Techcomp, GC7900) equipped with a flame ionization detector (FID) and a thermal conductivity detector (TCD) was used to qualitatively and quantitatively determine the gaseous products (such as H<sub>2</sub> and CO or other gaseous hydrocarbons).

$$FE = \frac{Q_g}{Q_{total}} = \frac{n \cdot Z \cdot F}{Q_{total}} \times 100\% = \frac{V\% \cdot v \cdot z \cdot F}{I_{average} \cdot V_m} \times 100\% \quad (\text{Eq. S1})$$

Where V % is the relative content of gas product, v is CO<sub>2</sub> flow rate (40 sccm), z is the electron transfer number (z = 2, 2, 8, and 12 for H<sub>2</sub>, CO, CH<sub>4</sub>, and C<sub>2</sub>H<sub>4</sub>, respectively), F is the Faraday constant (96485 C·mol<sup>-1</sup>), V<sub>m</sub> is the gas molar volume (22.4 L·mol<sup>-1</sup> under standard conditions), I<sub>average</sub> is the total steady-state current density (mA·cm<sup>-2</sup>).

## 1.2 Liquid product analysis

Liquid products were detected by <sup>1</sup>H nuclear magnetic resonance spectroscopy (<sup>1</sup>H NMR). In the <sup>1</sup>H NMR spectra, the peak area of products such as formate was used to quantify the concentrations of formate and other liquid products. The faradaic efficiency (FE) of the liquid product was determined as follows:

$$FE = \frac{Q_L}{Q_T} = \frac{n \cdot Z \cdot F}{Q_T} \times 100\% \quad (\text{Eq. S2})$$

Where n is the mole of liquid product, z is the required number of electrons (z = 2, 6, 8, 12 and 18 for formate, methanol, acetate, ethanol, and 1-propanol, respectively). F is

Faraday constant ( $96485 \text{ C}\cdot\text{mol}^{-1}$ ),  $Q_L$  and  $Q_T$  are the charge used to produce the liquid product and the total charge consumed in  $\text{CO}_2\text{RR}$ , respectively.

## 2 Kinetics calculation section of CO<sub>2</sub>RR to formate

The kinetic parameters of the kinetic models were obtained by fitting the models with steady-state internal resistance (IR)-corrected  $J_{\text{HCOO}^-}$ - $V$  curves using a global optimization method, which comprises a random search using genetic algorithm and a local optimization employing a trust-region reflective algorithm. All simulations were performed using a commercial software package (MATLAB R2010b, the MathWorks Inc.). The reaction rate equations and control equations are listed in Table S2. The corresponding kinetic parameters under 20 mA·cm<sup>-2</sup> are listed in Table S3. The active site content normalized kinetic parameters under 20 mA·cm<sup>-2</sup> are listed in Table S4.

### 3 Supporting Figures and Tables

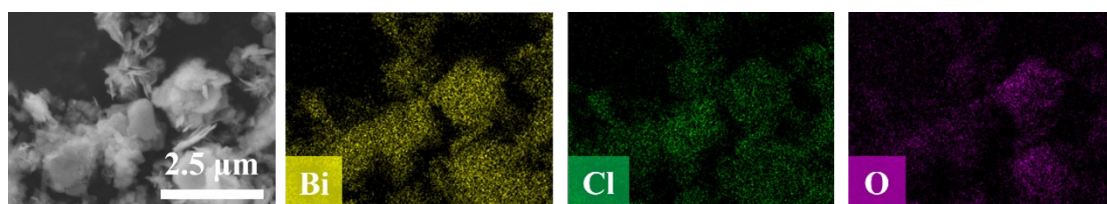

**Figure. S1.** The SEM image of BiOCl catalysts.

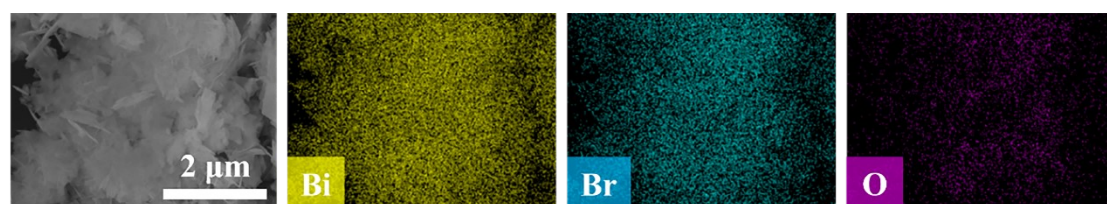

**Figure. S2.** The SEM image of Bi<sub>m</sub>O<sub>n</sub>Br<sub>p</sub> catalysts.

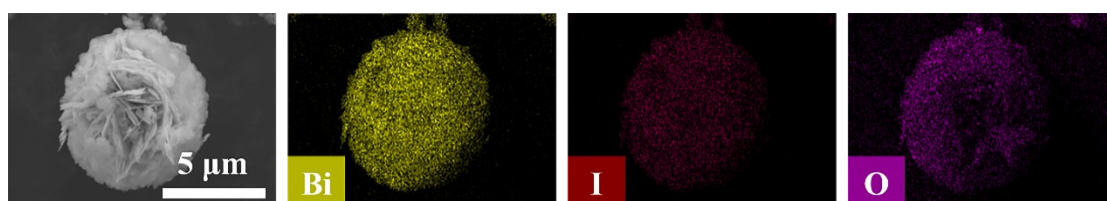

**Figure. S3.** The SEM image of BiOI catalysts

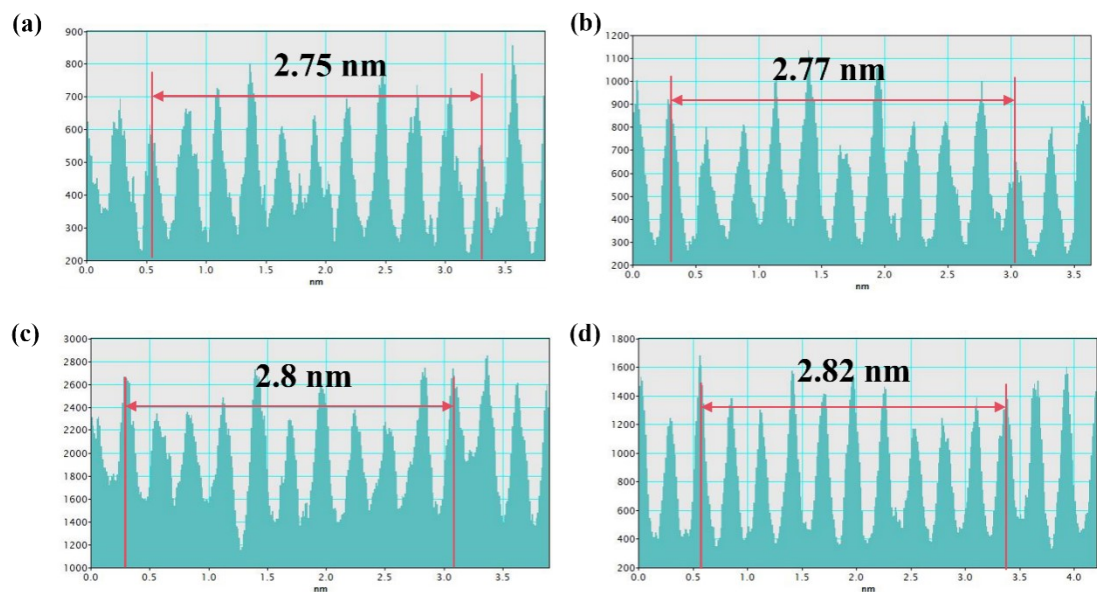

**Figure. S4.** The atomic intensity line scanning analysis images. (a) BiOCl, (b) BiOBr, (c)  $\text{Bi}_{24}\text{O}_{31}\text{Br}_{10}$  and (d) BiOI catalyst

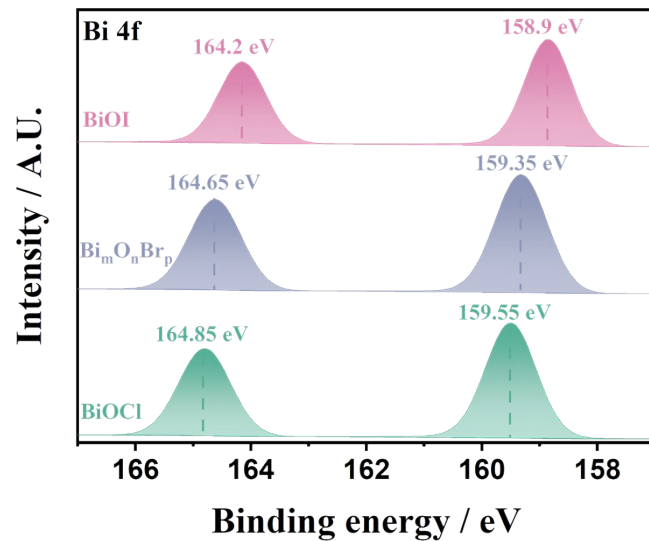

**Figure. S5.** The XPS Bi 4f spectrum of BiOCl,  $\text{Bi}_m\text{O}_n\text{Br}_p$  and BiOI.

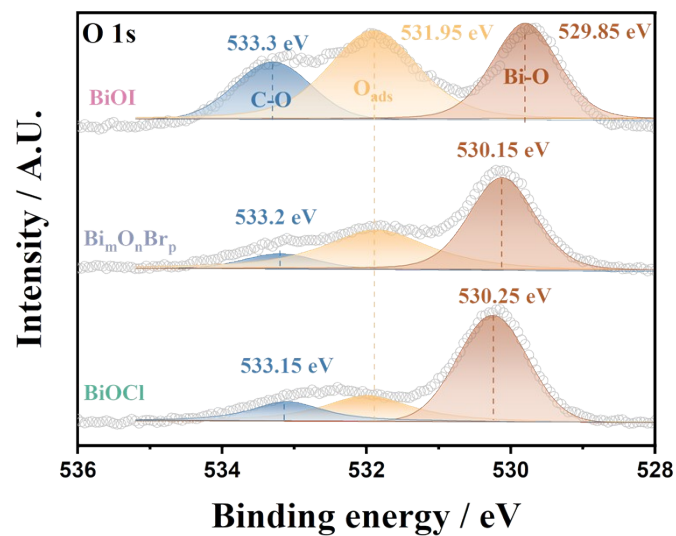

**Figure. S6.** The XPS O 1s spectrum of BiOCl, Bi<sub>m</sub>O<sub>n</sub>Br<sub>p</sub> and BiOI. The peaks were assigned to Bi-O structure (529.85 ~ 530.25 eV)[1], O<sub>ads</sub> (531.95 eV)[2] and C-O structure (533.15 ~ 533.3 eV). The C-O signal maybe come from formation of Bi<sub>2</sub>O<sub>2</sub>CO<sub>3</sub> reaction with CO<sub>2</sub> in the air. The content result was listed in Table S1.

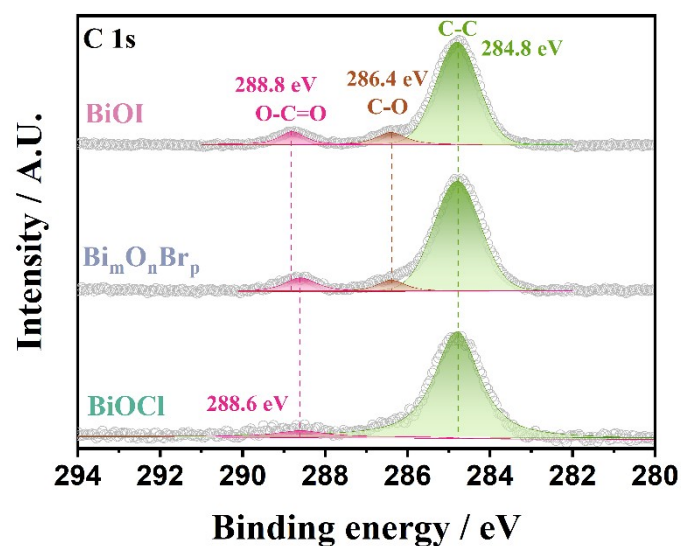

**Figure. S7.** The XPS C 1s spectrum of BiOCl, Bi<sub>m</sub>O<sub>n</sub>Br<sub>p</sub> and BiOI. The peaks were assigned to carbon in nature (284.8 eV), C-O structure (286.4 eV)[3] and O-C=O



structure (288.6 ~ 288.8 eV). The C-O and O-C=O signal maybe come from formation of  $\text{Bi}_2\text{O}_2\text{CO}_3$  reaction with  $\text{CO}_2$  in the air. The content result was listed in Table S2.

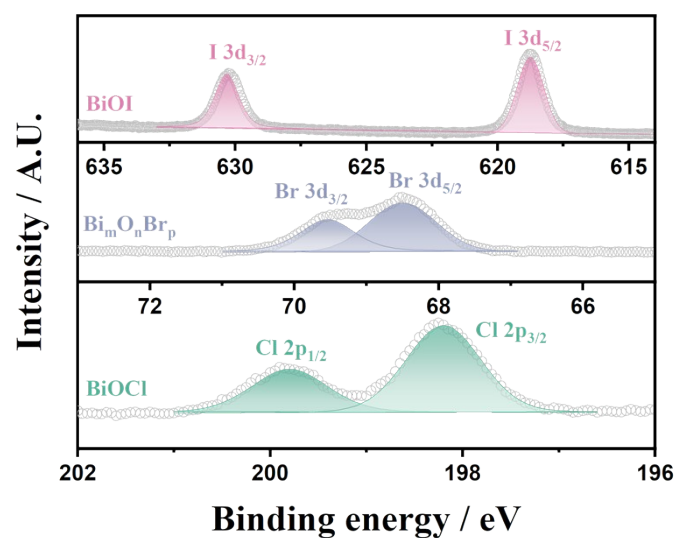

**Figure. S8.** The XPS Cl, Br, I spectra of BiOCl,  $\text{Bi}_m\text{O}_n\text{Br}_p$  and BiOI.

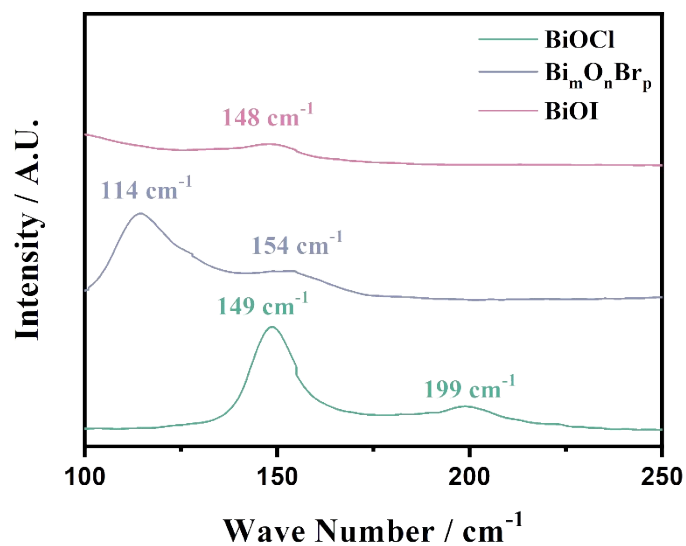

**Figure. S9.** The Raman spectra of BiOCl,  $\text{Bi}_m\text{O}_n\text{Br}_p$  and BiOI. In Raman spectra, the peaks at  $149\text{ cm}^{-1}$  and  $199\text{ cm}^{-1}$  can be assigned to  $A_{1g}$  internal Bi-Cl stretching mode and  $E_g$  internal Bi-Cl stretching mode[4]; those at  $114\text{ cm}^{-1}$  and  $154\text{ cm}^{-1}$  can be assigned to  $A_{1g}$  internal Bi-Br stretching mode and  $E_g$  internal Bi-Br stretching

mode[5]; the characteristic Raman peak of BiOI locates at  $148\text{ cm}^{-1}$ [6, 7].

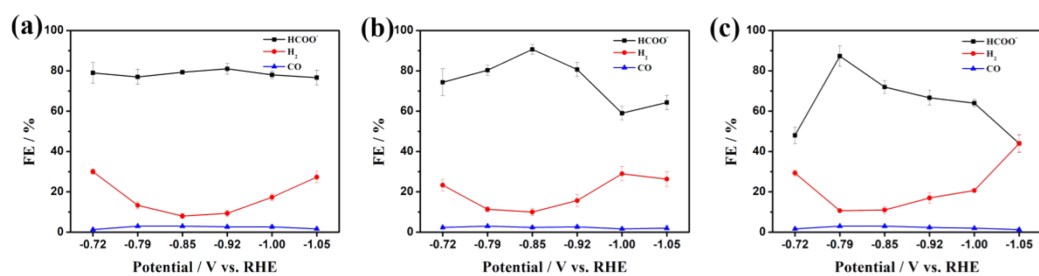

**Figure. S10.** The BiOX Faradic efficiency of formate, H<sub>2</sub> and CO during CO<sub>2</sub>RR from -0.72 V to -1.05 V vs. RHE of (a) BiOCl, (b) Bi<sub>m</sub>O<sub>n</sub>Br<sub>p</sub> and (c) BiOI.

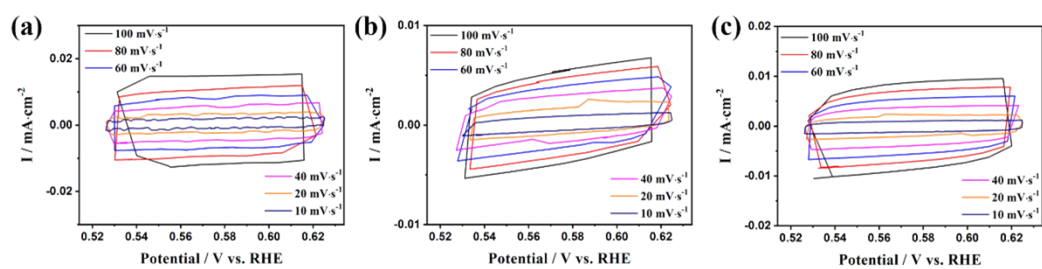

**Figure. S11.** The CV curves of the BiOX catalysts during ECSA test from  $100\text{ mV}\cdot\text{s}^{-1}$  to  $10\text{ mV}\cdot\text{s}^{-1}$ . (a) BiOCl, (b) Bi<sub>m</sub>O<sub>n</sub>Br<sub>p</sub> and (c) BiOI.

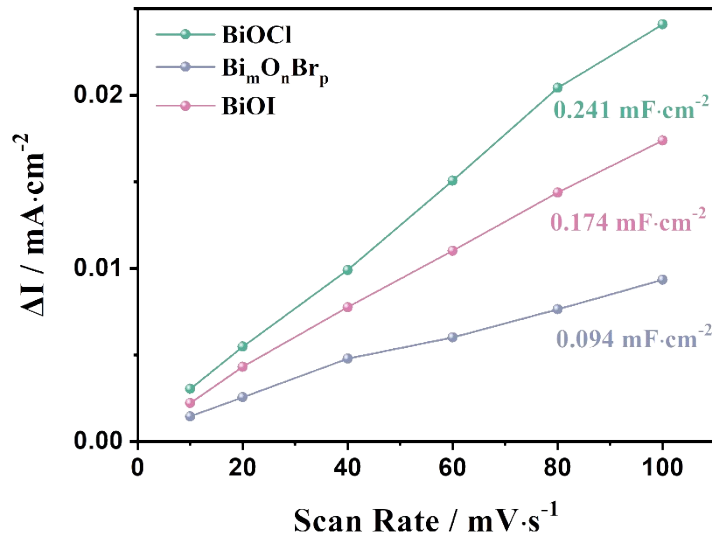

**Figure. S12.** The  $C_{dl}$  value of BiOCl,  $\text{Bi}_m\text{O}_n\text{Br}_p$  and BiOI.  $\text{Bi}_m\text{O}_n\text{Br}_p$  has the lowest  $C_{dl}$  ( $0.094 \text{ mF}\cdot\text{cm}^{-2}$ ) compared with BiOCl ( $0.241 \text{ mF}\cdot\text{cm}^{-2}$ ) and BiOI ( $0.174 \text{ mF}\cdot\text{cm}^{-2}$ ), support that  $\text{Bi}_m\text{O}_n\text{Br}_p$  high performance is attributed to the feature of active sites rather than the number of the active sites.

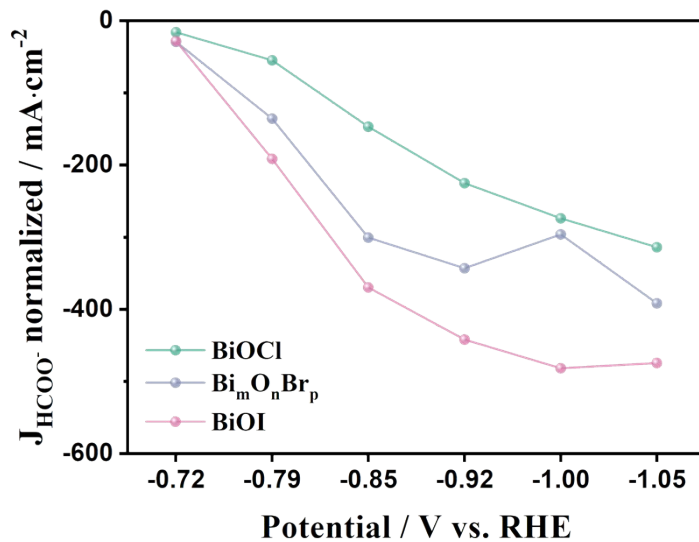

**Figure. S13.** The  $C_{dl}$  normalized formate partial current density of BiOCl,  $\text{Bi}_m\text{O}_n\text{Br}_p$  and BiOI. BiOI has the largest normalized  $J_{\text{HCOO}^-}$ , which means that BiOI has the most

CO<sub>2</sub>RR active sites density. The Bi<sub>m</sub>O<sub>n</sub>Br<sub>p</sub> anomalous J<sub>HCOO<sup>-</sup></sub> decrease in 1.0 V (vs. RHE) observed here is a common phenomenon during electrode selectivity test on Bi-based catalysts. Numerous publications have mentioned a sudden decrease in formic acid faradaic efficiency at around -1.0 V vs. RHE[7, 8]. Therefore, the phenomenon observed in this paper is normal, and its underlying mechanism is expected to be further explored by subsequent researchers.

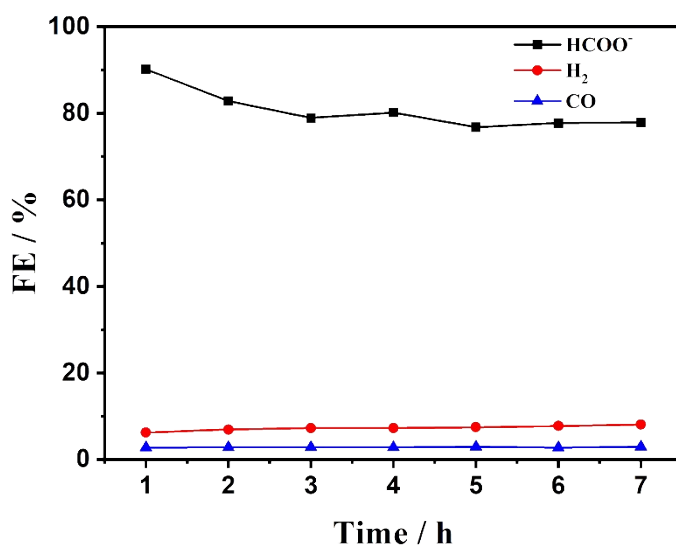

**Figure. S14.** The Bi<sub>m</sub>O<sub>n</sub>Br<sub>p</sub> FE of formate, H<sub>2</sub> and CO generation during the 7h CO<sub>2</sub>RR stability test.

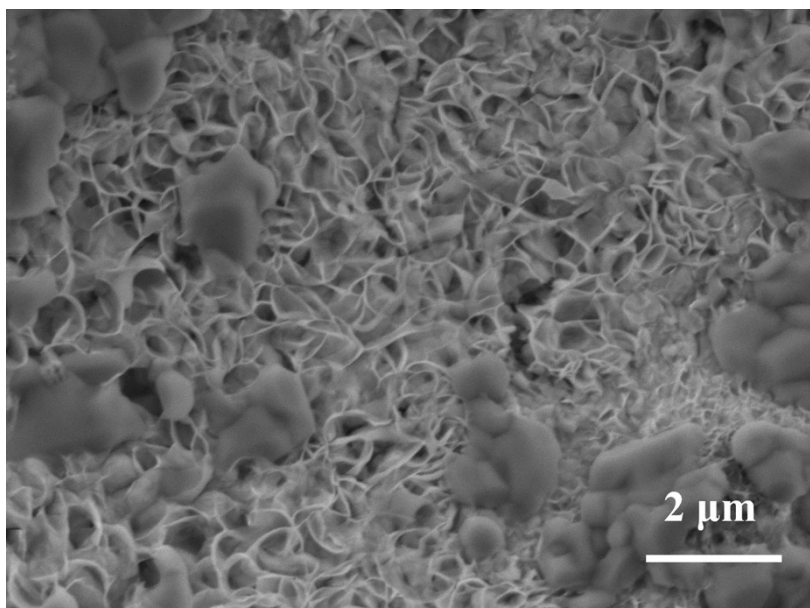

**Figure. S15.** The SEM image of  $\text{Bi}_m\text{O}_n\text{Br}_p$  after 7 hours electrolysis

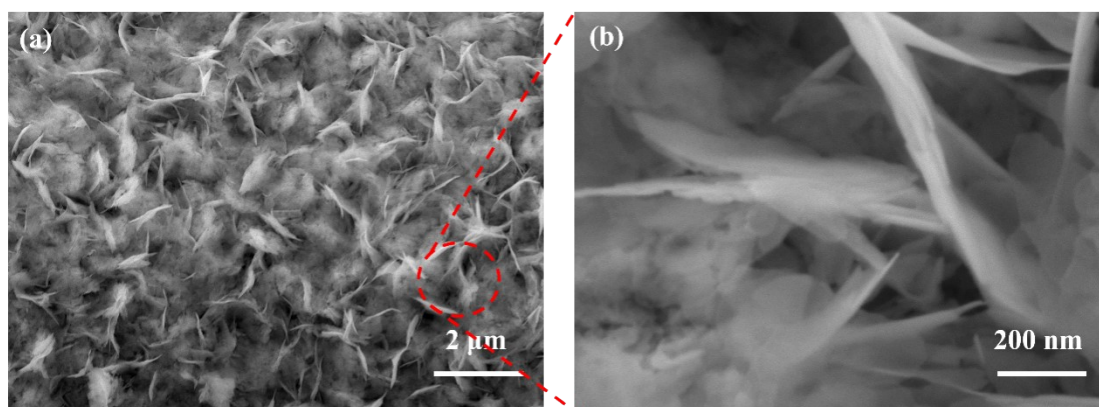

**Figure. S16.** The SEM image of  $\text{Bi}_m\text{O}_n\text{Br}_p$  after 1 hour electrolysis. (a) The SEM image of electrode surface. (b) The SEM image of electrode surface under high magnification.

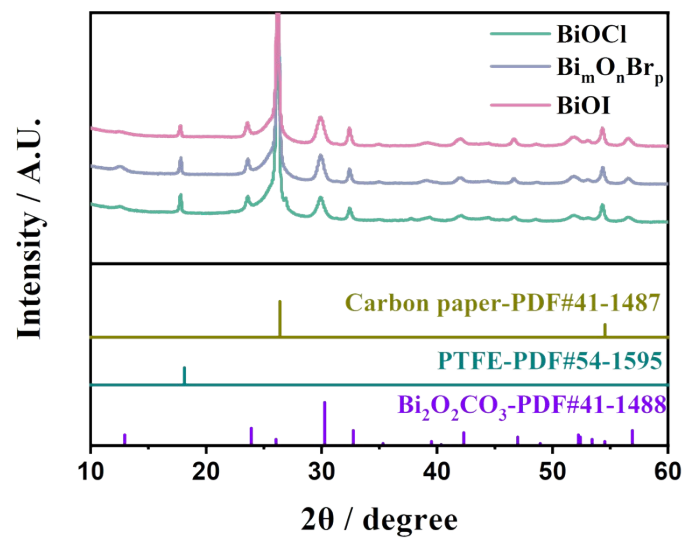

**Figure. S17.** The XRD pattern of BiOCl, Bi<sub>m</sub>O<sub>n</sub>Br<sub>p</sub> and BiOI after CO<sub>2</sub>RR.

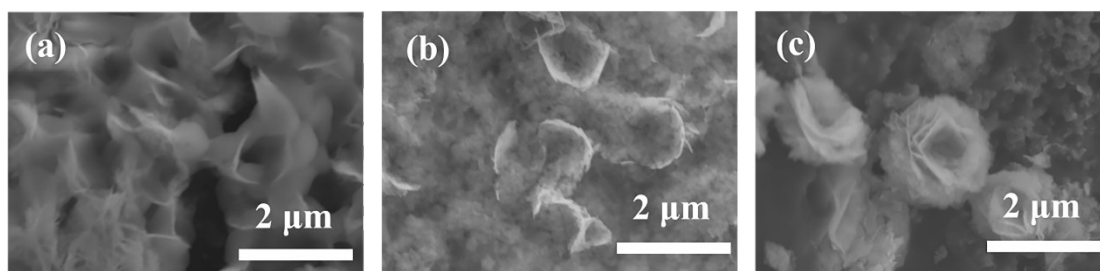

**Figure. S18.** The SEM images of (a) BiOCl, (b) Bi<sub>m</sub>O<sub>n</sub>Br<sub>p</sub> and (c) BiOI after CO<sub>2</sub>RR.

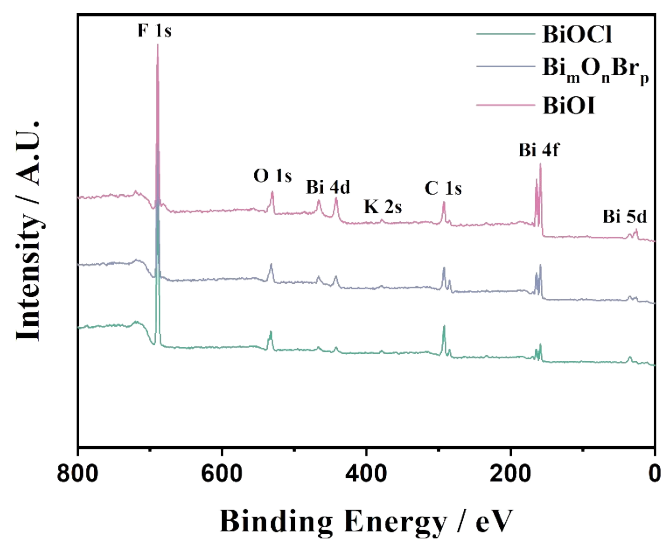

**Figure. S19.** The XPS total spectra of  $\text{Bi}_m\text{O}_n\text{X}_p$ -derived  $\text{Bi}_2\text{O}_2\text{CO}_3$  catalysts after  $\text{CO}_2\text{RR}$ .

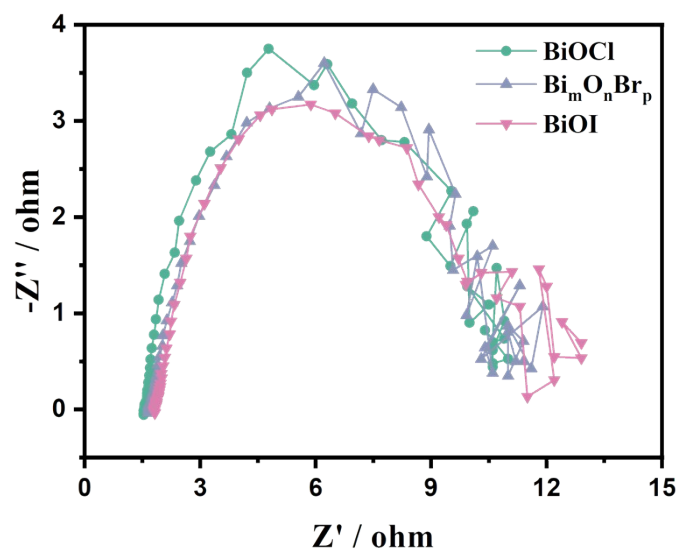

**Figure. S20.** The EIS test results of  $\text{BiOCl}$ ,  $\text{Bi}_m\text{O}_n\text{Br}_p$  and  $\text{BiOI}$  from 0.1 Hz to 20000 Hz. The Internal Resistance is 1.48  $\Omega$  of  $\text{BiOCl}$ , 1.64  $\Omega$  of  $\text{Bi}_m\text{O}_n\text{Br}_p$  and 1.55  $\Omega$  of  $\text{BiOI}$ .

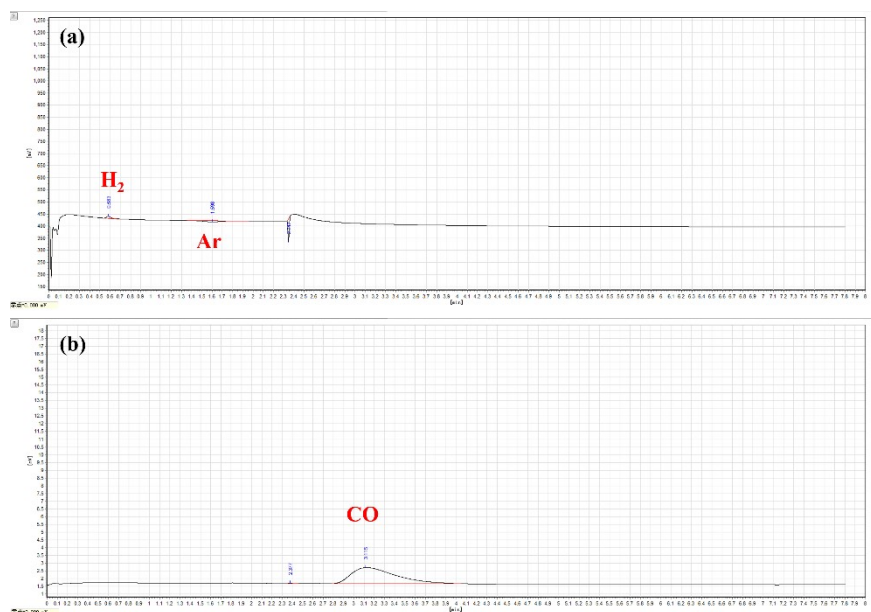

**Figure. S21.** The gas chromatographic spectra of  $Bi_mO_nBr_p$  during  $CO_2RR$  stability test. (a) TCD spectrum, (b) FID spectrum. The  $H_2$  and  $CO$  are only two gas products.

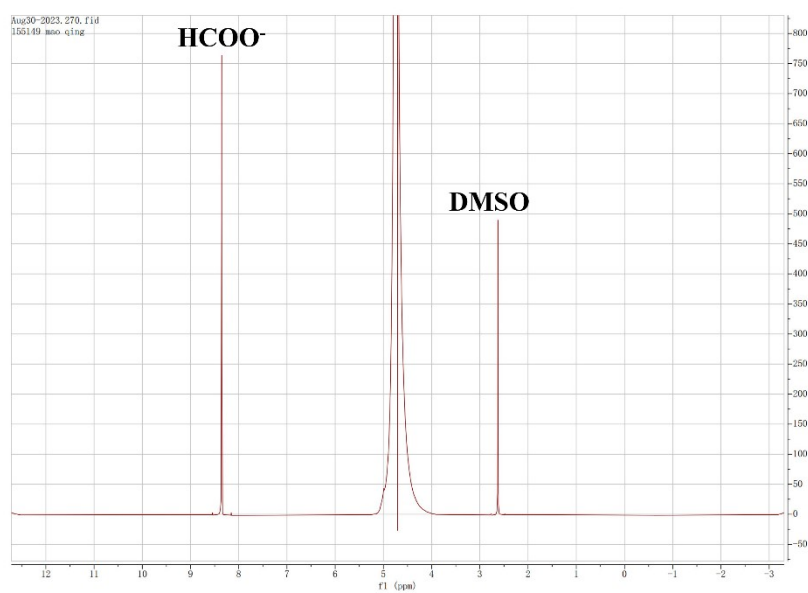

**Figure. S22.** The  $^1H$ -NMR spectrum of  $Bi_mO_nBr_p$  during  $CO_2RR$  stability test. The  $HCOO^-$  is the only one liquid product.



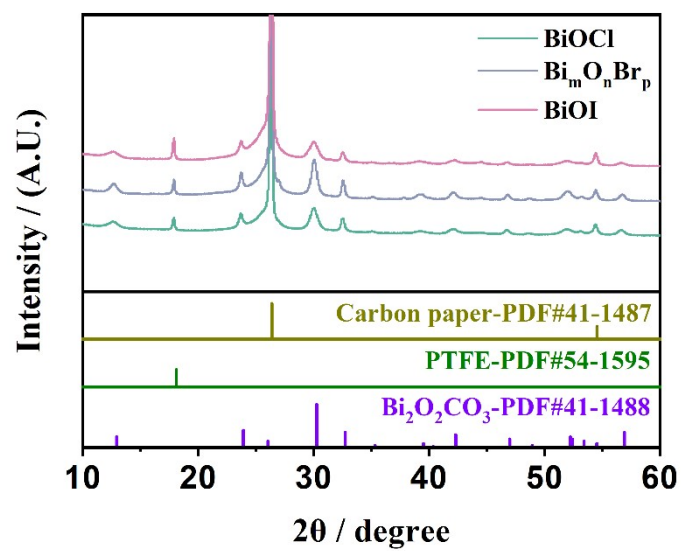

**Figure. S23.** The XRD pattern of BiOCl, Bi<sub>m</sub>O<sub>n</sub>Br<sub>p</sub> and BiOI after CV activation.

**Table S1.** The XPS O 1s content results of  $\text{Bi}_m\text{O}_n\text{X}_p$  before  $\text{CO}_2\text{RR}$ .

|                                    | Bi-O / % | $\text{O}_{\text{ads}}$ / % | C-O / % |
|------------------------------------|----------|-----------------------------|---------|
| BiOCl                              | 59.64    | 24.87                       | 15.49   |
| $\text{Bi}_m\text{O}_n\text{Br}_p$ | 49.66    | 41.66                       | 8.68    |
| BiOI                               | 34.26    | 45.02                       | 20.72   |

**Table S2.** The XPS C 1s content results of  $\text{Bi}_m\text{O}_n\text{X}_p$  before  $\text{CO}_2\text{RR}$ .

|                                    | C-C / % | O-C=O / % | C-O / % |
|------------------------------------|---------|-----------|---------|
| BiOCl                              | 94.31   | 5.69      | 0       |
| $\text{Bi}_m\text{O}_n\text{Br}_p$ | 82.87   | 7.13      | 10.00   |
| BiOI                               | 82.45   | 9.13      | 8.42    |

**Table S3.** Reaction rate equations and control equations for CO<sub>2</sub>RR to formate.

---

| Kinetic equations for the elementary steps of CO <sub>2</sub> RR                                                                                                       |          |
|------------------------------------------------------------------------------------------------------------------------------------------------------------------------|----------|
| $r_1 = K_{101} \cdot (1 - \theta_{CO_2,ads} - \theta_{COOH,ads}) \cdot \left(\frac{P_{CO_2}}{p^\theta}\right)$                                                         | (Eq. S1) |
| $r_{-1} = K_{102} \cdot \theta_{CO_2,ads}$                                                                                                                             | (Eq. S2) |
| $r_2 = K_{201} \cdot \theta_{CO_2,ads} \cdot \left(\frac{C_{CO_2}}{C^\theta}\right) \cdot \exp\left(\frac{\alpha F \eta}{RT}\right)$                                   | (Eq. S3) |
| $r_{-2} = K_{201} \cdot \theta_{COOH,ads} \cdot \left(\frac{C_{HCO_3^-}}{C^\theta}\right) \cdot \exp\left(-\frac{(1-\alpha)F\eta}{RT}\right)$                          | (Eq. S4) |
| $r_3 = K_{301} \cdot \theta_{COOH,ads} \cdot \exp\left(-\frac{\alpha F \eta}{RT}\right)$                                                                               | (Eq. S5) |
| $r_{-3} = K_{301} \cdot (1 - \theta_{CO_2,ads} - \theta_{COOH,ads}) \cdot \left(\frac{C_{HCOO^-}}{C^\theta}\right) \cdot \exp\left(-\frac{(1-\alpha)F\eta}{RT}\right)$ | (Eq. S6) |

---

| Control equations for the CO <sub>2</sub> RR process                        |          |
|-----------------------------------------------------------------------------|----------|
| $C_{CO_2,ads} \frac{dq_{CO_2}}{dt} = r_1 - r_{-1} - r_2 + r_{-2}$           | (Eq. S7) |
| $C_{COOH,ads} \frac{d\theta_{COOH}}{dt} = r_2 - r_{-2} - r_3 + r_{-3}$      | (Eq. S8) |
| $C_{dl} \frac{dE}{dt} = j(t) - [(r_2 - r_{-2}) + (r_3 - r_{-3})] \cdot F/n$ | (Eq. S9) |

---

**Note:** Where  $r$  is the elementary reaction rate ( $\text{mol}\cdot\text{m}^{-2}\cdot\text{s}^{-1}$ ),  $K$  is the reaction rate constant ( $\text{mol}\cdot\text{m}^{-2}\cdot\text{s}^{-1}$ ),  $c$  is the concentration ( $\text{mol}\cdot\text{m}^{-3}$ ),  $\theta$  is the coverage,  $\alpha$  is the symmetry coefficient,  $\eta$  is the overpotential (V),  $R$  is the gas constant ( $\text{J}\cdot\text{mol}^{-1}\cdot\text{K}^{-1}$ ),  $T$  is the temperature (K),  $\theta$  which subscripts CO<sub>2</sub> and COOH represent the intermediate CO<sub>2</sub>, ads and COOH, ads, respectively, and  $c$  which subscripts CO<sub>2</sub> and HCO<sub>3</sub><sup>-</sup>

represent the reactant  $\text{CO}_2$  and electrolyte  $\text{KHCO}_3$ , respectively.

**Table S4.** The rate constants under 20 mA·cm<sup>-2</sup> for the elementary steps of CO<sub>2</sub>RR on the BiOCl, Bi<sub>m</sub>O<sub>n</sub>Br<sub>p</sub> and BiOI-derived Bi<sub>2</sub>O<sub>2</sub>CO<sub>3</sub> catalysts.

| Rate Constants                                               | BiOCl                 | Bi <sub>m</sub> O <sub>n</sub> Br <sub>p</sub> | BiOI                   |
|--------------------------------------------------------------|-----------------------|------------------------------------------------|------------------------|
| $K_{101}$                                                    | $1.22 \times 10^{-1}$ | $2.62 \times 10^{-1}$                          | $1.60 \times 10^{-1}$  |
| $K_{102}$                                                    | $3.93 \times 10^1$    | $3.27 \times 10^{-2}$                          | $7.12 \times 10^{-2}$  |
| $K_{201} \cdot \exp\left(\frac{\alpha F \eta}{RT}\right)$    | $3.66 \times 10^{-7}$ | $1.52 \times 10^{-9}$                          | $3.53 \times 10^{-9}$  |
| $K_{202} \cdot \exp\left(-\frac{(1-\alpha)F\eta}{RT}\right)$ | $5.25 \times 10^{-9}$ | $8.71 \times 10^{-10}$                         | $3.01 \times 10^{-10}$ |
| $K_{301} \cdot \exp\left(\frac{\alpha F \eta}{RT}\right)$    | $8.27 \times 10^{-5}$ | $2.24 \times 10^{-5}$                          | $5.67 \times 10^{-6}$  |
| $K_{302} \cdot \exp\left(-\frac{(1-\alpha)F\eta}{RT}\right)$ | $7.98 \times 10^{-4}$ | $4.15 \times 10^{-3}$                          | $2.31 \times 10^{-3}$  |

**Table S5.** The active site normalized content rate constants under 20 mA·cm<sup>-2</sup> for the elementary steps of CO<sub>2</sub>RR on the BiOCl, Bi<sub>m</sub>O<sub>n</sub>Br<sub>p</sub> and BiOI-derived Bi<sub>2</sub>O<sub>2</sub>CO<sub>3</sub> catalysts.

| Normalized Rate Constants                           | BiOCl                 | Bi <sub>m</sub> O <sub>n</sub> Br <sub>p</sub> | BiOI                  |
|-----------------------------------------------------|-----------------------|------------------------------------------------|-----------------------|
| $K_{101}/N$                                         | $6.08 \times 10^0$    | $1.90 \times 10^1$                             | $3.02 \times 10^0$    |
| $K_{102}/N$                                         | $1.96 \times 10^3$    | $2.38 \times 10^0$                             | $1.34 \times 10^0$    |
| $K_{201} \cdot \exp(\frac{\alpha F \eta}{RT})/N$    | $1.83 \times 10^{-5}$ | $1.11 \times 10^{-7}$                          | $6.66 \times 10^{-8}$ |
| $K_{202} \cdot \exp(-\frac{(1-\alpha)F\eta}{RT})/N$ | $2.63 \times 10^{-7}$ | $6.33 \times 10^{-8}$                          | $5.67 \times 10^{-9}$ |
| $K_{301} \cdot \exp(\frac{\alpha F \eta}{RT})/N$    | $4.13 \times 10^{-3}$ | $1.62 \times 10^{-3}$                          | $1.07 \times 10^{-4}$ |
| $K_{302} \cdot \exp(-\frac{(1-\alpha)F\eta}{RT})/N$ | $3.99 \times 10^{-2}$ | $3.02 \times 10^{-1}$                          | $4.36 \times 10^{-2}$ |

**Note:** Where N is the parameter which represents active site content. N=Bi-O content (%) × C<sub>dl</sub>. The Bi-O content were calculated by XPS O1s results after CO<sub>2</sub>RR.

**Table S6.** The XPS O 1s content results of Bi<sub>m</sub>O<sub>n</sub>X<sub>p</sub> after CO<sub>2</sub>RR.

|                                                  | <b>Bi-O / %</b> | <b>O-C=O / %</b> | <b>O<sub>ads</sub> / %</b> | <b>O-F / %</b> |
|--------------------------------------------------|-----------------|------------------|----------------------------|----------------|
| <b>BiOCl</b>                                     | <b>8.30</b>     | <b>7.76</b>      | <b>59.65</b>               | <b>24.29</b>   |
| <b>Bi<sub>m</sub>O<sub>n</sub>Br<sub>p</sub></b> | <b>14.65</b>    | <b>18.20</b>     | <b>51.23</b>               | <b>15.92</b>   |
| <b>BiOI</b>                                      | <b>30.50</b>    | <b>23.47</b>     | <b>29.46</b>               | <b>16.57</b>   |



**Table S7.** The mole fraction of  $\text{Bi}^{3+}$  dissolution of  $\text{BiOCl}$ ,  $\text{Bi}_m\text{O}_n\text{Br}_p$  and  $\text{BiOI}$  calculated by ICP-OES results.

|                                                      | <b><math>\text{Bi}^{3+}</math> dissolution mole fraction / %</b> |
|------------------------------------------------------|------------------------------------------------------------------|
| <b><math>\text{BiOCl}</math></b>                     | <b>3.099</b>                                                     |
| <b><math>\text{Bi}_m\text{O}_n\text{Br}_p</math></b> | <b>3.026</b>                                                     |
| <b><math>\text{BiOI}</math></b>                      | <b>2.988</b>                                                     |

**Table S8.** Comparison of catalytic performances of  $\text{Bi}_m\text{O}_n\text{Br}_p$  catalysts and the reported Bi-based catalysts in H-type cell when they reach at 90 %  $\text{FE}_{\text{HCOO}^-}$

|                                                      | $\text{J}_{\text{HCOO}^-} / \text{mA}\cdot\text{cm}^{-2}$ | Potential / V (vs. RHE) |
|------------------------------------------------------|-----------------------------------------------------------|-------------------------|
| $\text{Bi}_m\text{O}_n\text{Br}_p$ (This work)       | 52.31                                                     | -0.85                   |
| $\text{Bi}_2\text{O}_2\text{S}$ [10]                 | 32.7                                                      | -0.90                   |
| $\text{CeO}_x\text{-Bi}_2\text{O}_2\text{CO}_3$ [11] | 18                                                        | -1.00                   |
| BiOI microflower[12]                                 | 41.3                                                      | -1.00                   |
| $\text{Bi@B}_2\text{O}_2\text{CO}_3$ [13]            | 20                                                        | -0.80                   |
| Bi-BTB[9]                                            | 12.70                                                     | -0.67                   |
| 2D- $\text{Bi}_2\text{O}_2\text{CO}_3$ [14]          | 3                                                         | -0.80                   |
| $\text{Bi}_2\text{O}_3\text{@C-800}$ [15]            | 7.5                                                       | -0.90                   |
| $\text{BiPO}_4$ [16]                                 | 17                                                        | -1.20                   |
| 2D-Bi[17]                                            | 21                                                        | -0.83                   |
| In / Bi-750[18]                                      | 32.22                                                     | -1.40                   |
| Bi- $\text{TiO}_2$ -700[19]                          | 8.4                                                       | -1.00                   |
| $\text{Bi}_5\text{O}_7\text{I}$ [20]                 | 14.9                                                      | -0.89                   |
| $\text{Bi}_2\text{S}_3\text{-ppy}$ [21]              | 56.95                                                     | -1.20                   |

## Reference

- [1] Hu R., Xiao X., Tu S., et al. Synthesis of flower-like heterostructured  $\beta$ - $\text{Bi}_2\text{O}_3$  /  $\text{Bi}_2\text{O}_2\text{CO}_3$  microspheres using  $\text{Bi}_2\text{O}_2\text{CO}_3$  self-sacrifice precursor and its visible-light-induced photocatalytic degradation of o-phenylphenol[J]. *Applied Catalysis B: Environmental*, 2015, 163: 510-519.
- [2] Xu Y., Guo Y., Sheng Y., et al. Selective  $\text{CO}_2$  Electroreduction to Formate on Polypyrrole-Modified Oxygen Vacancy-Rich  $\text{Bi}_2\text{O}_3$  Nanosheet Precatalysts by Local Microenvironment Modulation[J]. *Small*, 2023, 19(29): 2300001.
- [3] Greczynski G., Hultman L. The same chemical state of carbon gives rise to two peaks in X-ray photoelectron spectroscopy[J]. *Scientific Reports*, 2021, 11(1): 11195.
- [4] Dong F., Sun Y., Fu M., et al. Room temperature synthesis and highly enhanced visible light photocatalytic activity of porous  $\text{BiOI} / \text{BiOCl}$  composites nanoplates microflowers[J]. *Journal of Hazardous Materials*, 2012, 219-220: 26-34.
- [5] Zhang D., Li J., Wang Q., et al. High {001} facets dominated  $\text{BiOBr}$  lamellas: facile hydrolysis preparation and selective visible-light photocatalytic activity[J]. *Journal of Materials Chemistry A*, 2013, 1(30): 8622-8629.
- [6] Abuelwafa A. A., Matiur R. M., Putri A. A., et al. Synthesis, structure, and optical properties of the nanocrystalline bismuth oxyiodide ( $\text{BiOI}$ ) for optoelectronic application[J]. *Optical Materials*, 2020, 109: 110413.
- [7] Jiang Z., Liang X., Liu Y., et al. Enhancing visible light photocatalytic degradation performance and bactericidal activity of  $\text{BiOI}$  via ultrathin-layer structure[J]. *Applied*

Catalysis B: Environmental, 2017, 211: 252-257.

[8] Fu H. Q., Liu J., Bedford N. M., et al. Operando Converting BiOCl into  $\text{Bi}_2\text{O}_2(\text{CO}_3)_x\text{Cl}_y$  for Efficient Electrocatalytic Reduction of Carbon Dioxide to Formate[J]. Nano-Micro Letters, 2022, 14(1): 121.

[9] Yuan W.-W., Wu J.-X., Zhang X.-D., et al. In situ transformation of bismuth metal-organic frameworks for efficient selective electroreduction of  $\text{CO}_2$  to formate[J]. Journal of Materials Chemistry A, 2020, 8(46): 24486-24492.

[10] Liu S., Wang T., Liu X., et al. In Situ Dissociated Chalcogenide Anions Regulate the Bi-Catalyst / Electrolyte Interface with Accelerated Surface Reconstruction toward Efficient  $\text{CO}_2$  Reduction[J]. ACS Catalysis, 2024, 14(1): 489-497.

[11] He A., Wang C., Zhang N., et al. Oxygen vacancy-rich  $\text{CeO}_x\text{-Bi}_2\text{O}_2\text{CO}_3$  nanosheets for enhancing electrocatalytic reduction of  $\text{CO}_2$  to formate[J]. Applied Surface Science, 2023, 638: 158140.

[12] Liu P. F., Zu M. Y., Zheng L. R., et al. Bismuth oxyiodide microflower-derived catalysts for efficient  $\text{CO}_2$  electroreduction in a wide negative potential region[J]. Chemical Communications, 2019, 55(82): 12392-12395.

[13] Liang X.-D., Zheng Q.-Z., Wei N., et al. In-situ constructing  $\text{Bi@Bi}_2\text{O}_2\text{CO}_3$  nanosheet catalyst for ampere-level  $\text{CO}_2$  electroreduction to formate[J]. Nano Energy, 2023, 114: 108638.

[14] Cho W. S., Hong D. M., Dong W. J., et al. Poriously Reduced 2-Dimensional  $\text{Bi}_2\text{O}_2\text{CO}_3$  Petals for Strain-Mediated Electrochemical  $\text{CO}_2$  Reduction to  $\text{HCOOH}$ [J]. Energy & Environmental Materials, 2024, 7(1): e12490.

- [15] Deng P., Yang F., Wang Z., et al. Metal–Organic Framework-Derived Carbon Nanorods Encapsulating Bismuth Oxides for Rapid and Selective CO<sub>2</sub> Electroreduction to Formate[J]. *Angewandte Chemie International Edition*, 2020, 59(27): 10807-10813.
- [16] Fan T., Ma W., Xie M., et al. Achieving high current density for electrocatalytic reduction of CO<sub>2</sub> to formate on bismuth-based catalysts[J]. *Cell Reports Physical Science*, 2021, 2(3): 100353.
- [17] Yang S., Jiang M., Zhang W., et al. In Situ Structure Refactoring of Bismuth Nanoflowers for Highly Selective Electrochemical Reduction of CO<sub>2</sub> to Formate[J]. *Advanced Functional Materials*, 2023, 33(37).
- [18] Wang Q., Yang X., Zang H., et al. InBi Bimetallic Sites for Efficient Electrochemical Reduction of CO<sub>2</sub> to HCOOH[J]. *Small*, 2023, 19(41).
- [19] Jia G., Wang Y., Sun M., et al. Size Effects of Highly Dispersed Bismuth Nanoparticles on Electrocatalytic Reduction of Carbon Dioxide to Formic Acid[J]. *Journal of the American Chemical Society*, 2023, 145(25): 14133-14142.
- [20] Wang Q., Ma M., Zhang S., et al. Influence of the Chemical Compositions of Bismuth Oxyiodides on the Electroreduction of Carbon Dioxide to Formate[J]. *ChemPlusChem*, 2020, 85(4): 672-678.
- [21] Li C., Liu Z., Zhou X., et al. Bio-inspired engineering of Bi<sub>2</sub>S<sub>3</sub>–PPy composite for the efficient electrocatalytic reduction of carbon dioxide[J]. *Energy & Environmental Science*, 2023, 16(9): 3885-3898.
